# Supplementary material for: Specific enzymatic synthesis of 2,3-diaminophenazine and copper nanoclusters used for dual-emission ratiometric and naked-eye visual fluorescence sensing of choline
Source: Royal Society of Chemistry journal article supplement (doi:10.1039/c8nj03927e), 2018-01-01
Supplement: c8nj03927e1.pdf [file c8nj03927e1.pdf]

# Specific enzymatic synthesis of 2,3-diaminophenazine and copper nanoclusters used for dual-emitting ratiometric and naked-eye visual fluorescence sensing of choline

Xiangning Bu, Yongxin Fu, Hui Jin\* and Rijun Gui\*

*College of Chemistry and Chemical Engineering, Shandong Sino-Japanese Center for Collaborative Research of Carbon Nanomaterials, Laboratory of Fiber Materials and Modern Textile, The Growing Base for State Key Laboratory, Qingdao University, Shandong 266071, P.R. China. E-mail address: jh8381@163.com (H. Jin); guirijun@163.com (R. Gui). Tel.: +86 532 85953981; Fax: +86 532 85950873*

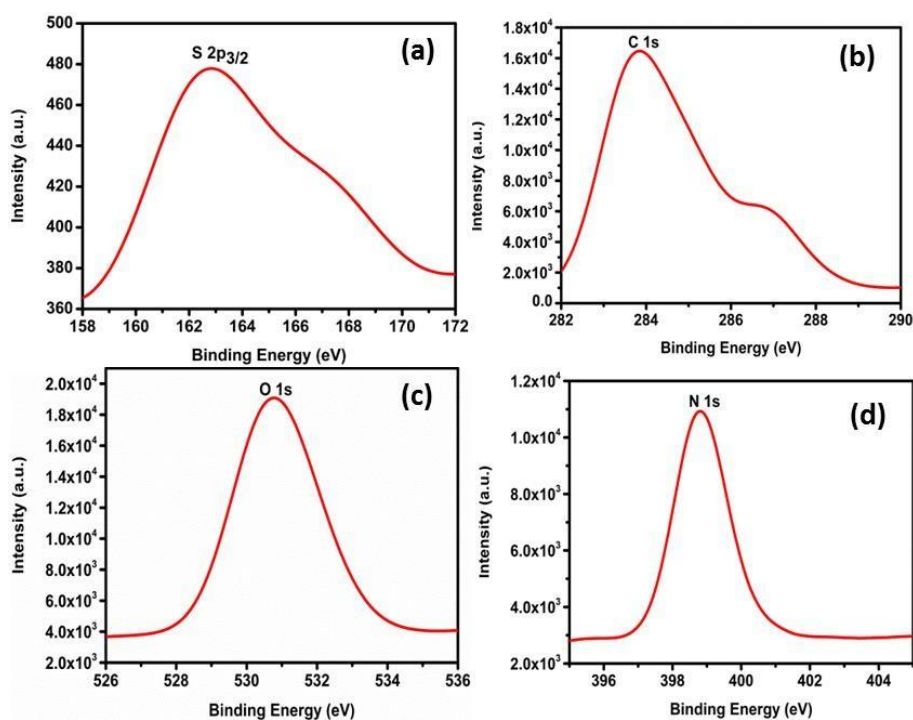

**Fig. S1.** The high-resolution XPS spectra of CuNCs, splitting from S2p (a), C1s (b), O1s (c), and N1s (d).

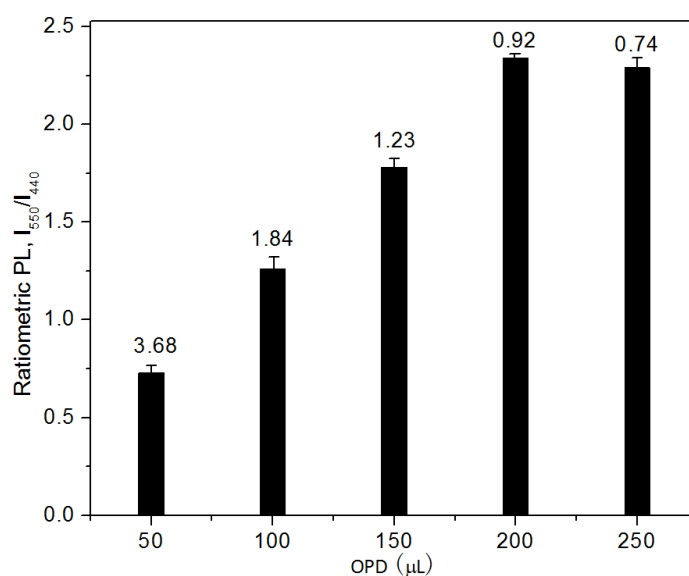

**Fig. S2.** The relationship of ratiometric FL ( $I_{550}/I_{440}$ ) intensities *versus* the coexisting volumes of OPD in a mixture solution. The mixture solution containing CuNCs ( $40 \mu\text{L}$ ,  $1.0 \text{ mg mL}^{-1}$ ), HRP ( $1 \text{ mg mL}^{-1}$ ), choline oxidase ( $0.075 \text{ U mL}^{-1}$ ) and choline ( $80 \mu\text{M}$ ). OPD ( $2 \text{ mM}$ ) was added into the mixture solution. The finally added contents of OPD were regulated from 50, 100, 150, 200 to 250  $\mu\text{L}$ . The corresponding mass concentration ratios of CuNCs and OPD were calculated to be 3.68, 1.84, 1.23, 0.92 and 0.74, respectively. FL emission spectra of these resulting mixture solutions in the coexistence of OPD were measured repeatedly, and the corresponding values of  $I_{550}/I_{440}$  were calculated and expressed as the average values of six measurements.

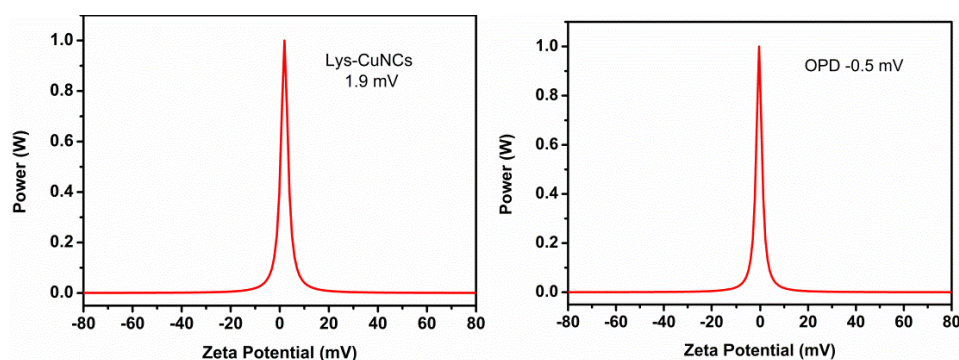

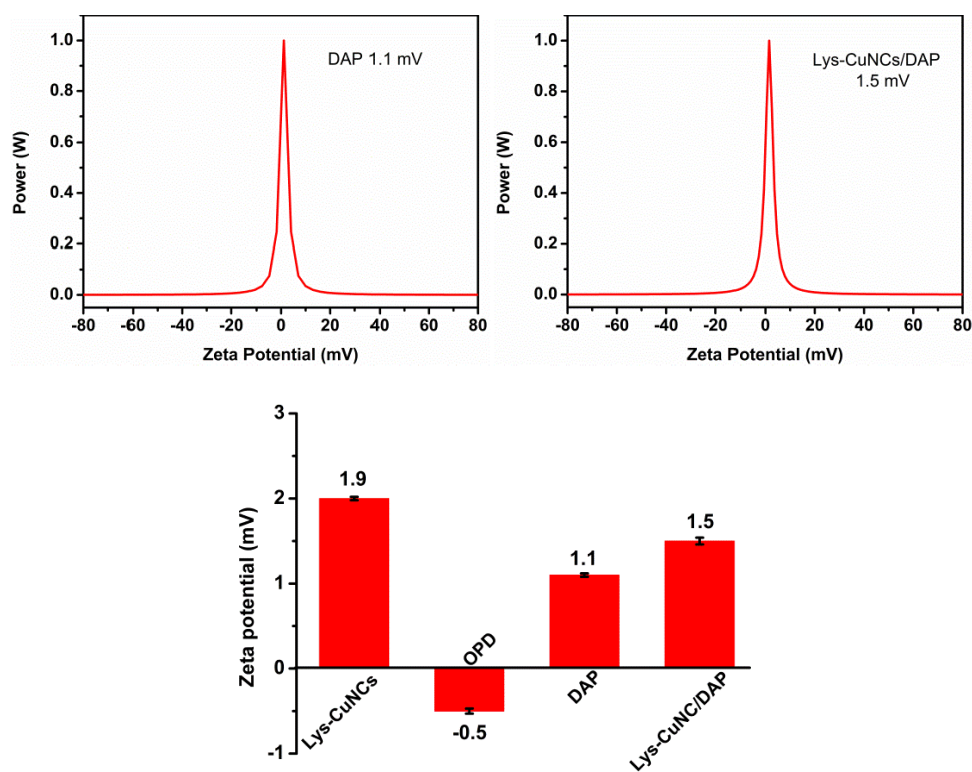

**Fig. S3.** Zeta potential measurements and average Zeta potentials of OPD, DAP, lysozyme-CuNCs before and after the addition of DAP.

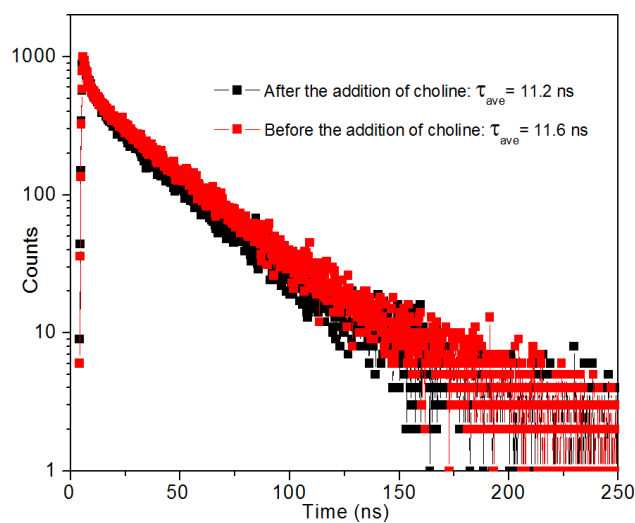

**Fig. S4.** The time-resolved fluorescence decay curves of CuNCs-based mixture sensing system before and after the addition of choline (80  $\mu$ M). The measured samples were excited at 335 nm and the emission wavelength was set at 440 nm.

**Table S 1.** A brief comparison of different analysis methods for choline detection.

| Analysis method                                | Linear detection range                    | LOD                              | Ref.                    |
|------------------------------------------------|-------------------------------------------|----------------------------------|-------------------------|
| Electrochemical sensor                         | 1~100 $\mu\text{M}$                       | 1.12 $\mu\text{M}$               | Xie et al. 2017         |
| Electrochemical sensor                         | 300~5100 $\mu\text{M}$                    | 82.5 $\mu\text{M}$               | Thiagarajan et al. 2016 |
| Electrochemical sensor                         | 1~800 $\mu\text{M}$                       | 0.3 $\mu\text{M}$                | Zhang et al. 2014       |
| Electrochemical sensor                         | 5~200 $\mu\text{M}$                       | –                                | Pal et al. 2014         |
| Chemiluminescence                              | $1.25 \times 10^{-3}$ ~94.5 $\mu\text{M}$ | $5 \times 10^{-4}$ $\mu\text{M}$ | Chen et al. 2016        |
| Colorimetric method                            | 1~180 $\mu\text{M}$                       | 0.4 $\mu\text{M}$                | Nirala et al. 2018      |
| Fluorescent assay                              | 0.5~10 $\mu\text{M}$                      | 0.027 $\mu\text{M}$              | Valekar et al. 2018     |
| Liquid chromatography tandem mass spectrometry | 0.048~ $9.6 \times 10^4$ $\mu\text{M}$    | 0.029 $\mu\text{M}$              | Liu et al. 2016b        |
| Ratiometric FL biosensor                       | 0.1~80 $\mu\text{M}$                      | 0.025 $\mu\text{M}$              | This work               |

#### References

- Chen, H., Lu, Q., Liao, J., Yuan, R., Chen, S., 2016. *Chem. Commun.* 52(45), 7276–7279.
- Liu, J., Zhao, M., Zhou, J., Liu, C., Zheng, L., Yin, Y., 2016b. *J. Chromatogr. B* 1035, 42–48.
- Nirala, N.R., Vinita, Prakash, R., 2018. *Microchim. Acta* 185(4), 224(1–8).
- Pal, S., Sharma, M.K., Danielsson, B., Willander, M., Chatterjee, R., Bhand, S., 2014. *Biosens. Bioelectron.* 54, 558–564.
- Thiagarajan, V., Madhurantakam, S., Sethuraman, S., Balaguru Rayappan, J.B., Maheswari Krishnan, U., 2016. *J. Colloid Interface Sci.* 462, 334–340.
- Valekar, A.H., Batule, B.S., Kim, M.I., Cho, K.-H., Hong, D.-Y., Lee, U.H., Chang, J.-S., Park, H.G., Hwang, Y.K., 2018. *Biosens. Bioelectron.* 100, 161–168.
- Xie, L., Huang, X., Su, B., 2017. *ACS Sens.* 2(6), 803–809.
- Zhang, L., Chen, J., Wang, Y., Yu, L., Wang, J., Peng, H., Zhu, J., 2014. *Sens. Actuators B* 193, 904–910.

**Table S 2.** Detection of [choline] in real human serum and liquid milk samples based on the developed CuNCs-based ratiometric FL biosensor of choline.

| <sup>a</sup> Samples | Spiked / $\mu$ M | <sup>b</sup> Detected / $\mu$ M | Recovery /% | <sup>c</sup> RSD /% |
|----------------------|------------------|---------------------------------|-------------|---------------------|
| Liquid milk #1       | 0                | Not found                       | —           | —                   |
| Liquid milk #2       | 5                | 5.13 $\pm$ 0.09                 | 102.60      | 1.75                |
| Liquid milk #3       | 20               | 19.80 $\pm$ 0.29                | 99.00       | 1.46                |
| Liquid milk #4       | 40               | 38.70 $\pm$ 0.81                | 96.75       | 2.09                |
| Human serum #1       | 0                | Not found                       | —           | —                   |
| Human serum #2       | 5                | 5.15 $\pm$ 0.14                 | 103.00      | 2.72                |
| Human serum #3       | 20               | 20.57 $\pm$ 0.31                | 102.85      | 1.51                |
| Human serum #4       | 40               | 40.83 $\pm$ 0.84                | 102.07      | 2.06                |

Note: <sup>a</sup> Samples were prepared by 10-fold diluting real samples with PBS. <sup>b</sup> Detected results were expressed as the average of six repeated measurements  $\pm$  standard deviation (SD). <sup>c</sup> Relative standard deviation (RSD) results were defined as (SD/mean)  $\times$  100%.
